# Supplementary material for: Molecular and phenotypic characterization of seedling and adult plant leaf rust resistance in a world wheat collection
Source: PubMed Central journal article supplement (PMC3782647; doi:10.1007/s11032-013-9899-8), 2013-08-11
Supplement: 11032_2013_9899_MOESM1_ESM.pdf [file 11032_2013_9899_MOESM1_ESM.pdf]

**Table S1.** Accession names, country of origin and status of the WC germplasm

| <b>Accession</b> | <b>Country of Origin</b> | <b>Status</b>     |
|------------------|--------------------------|-------------------|
| North America    |                          | -                 |
| AC Minto         | Canada                   | Released cultivar |
| AC Vista         | Canada                   | Released cultivar |
| Biggar           | Canada                   | Released cultivar |
| Bluesky          | Canada                   | Released cultivar |
| Burnside         | Canada                   | -                 |
| BW 90            | Canada                   | -                 |
| CDC Teal         | Canada                   | Released cultivar |
| Columbus         | Canada                   | Released cultivar |
| Corrine          | Canada                   | -                 |
| Glenavon         | Canada                   | -                 |
| HY 320           | Canada                   | Released cultivar |
| HY358            | Canada                   | Released cultivar |
| Katepwa          | Canada                   | Released cultivar |
| Laura            | Canada                   | Released cultivar |
| Neepawa          | Canada                   | Released cultivar |
| Oslo             | Canada                   | Released cultivar |
| RL4452           | Canada                   | Breeding line     |
| Wildcat          | Canada                   | Released cultivar |
| Roblin           | Canada                   | Released cultivar |

| <b>Accession</b> | <b>Country of Origin</b> | <b>Status</b>     |
|------------------|--------------------------|-------------------|
| Arcola           | Canada                   | Released cultivar |
| Santa Elena      | Mexico                   | Released cultivar |
| Bajio            | Mexico                   | Released cultivar |
| Lom              | Mexico                   | Released cultivar |
| Tobari F66       | Mexico                   | Released cultivar |
| Andes            | Mexico                   | Released cultivar |
| Beloglina        | USA                      | Released cultivar |
| Marquillo        | USA                      | Released cultivar |
| Carina           | USA                      | Released cultivar |
| Touse            | USA                      | Released cultivar |
| Hope             | USA                      | Released cultivar |
| Kanred           | USA                      | Released cultivar |
| Nordic           | USA                      | Released cultivar |
| Prospur          | USA                      | Released cultivar |
| Red River 68     | USA                      | Released cultivar |
| Stoa             | USA                      | Released cultivar |
| Wheaton          | USA                      | Released cultivar |
| Buffum           | USA                      | -                 |
| South America    |                          | -                 |
| Argentina        | Argentina                | -                 |
| Benvenuto 3085   | Argentina                | Released cultivar |

| <b>Accession</b>       | <b>Country of Origin</b> | <b>Status</b>     |
|------------------------|--------------------------|-------------------|
| Buck Nandu             | Argentina                | Released cultivar |
| Buck Pucara            | Argentina                | Released cultivar |
| Calidad                | Argentina                | Released cultivar |
| El Gaucho              | Argentina                | Released cultivar |
| Klein otto Wulff       | Argentina                | Released cultivar |
| Klein Sendero          | Argentina                | Released cultivar |
| Klein Credito          | Argentina                | Released cultivar |
| Klein Toledo           | Argentina                | Breeding line     |
| Klein Universal        | Argentina                | Released cultivar |
| Retacon INTA           | Argentina                | Released cultivar |
| Rio Negro              | Argentina                | Released cultivar |
| Tezanos Printos Precoz | Argentina                | Released cultivar |
| Universal II           | Argentina                | Released cultivar |
| Victoria INTA          | Argentina                | Released cultivar |
| Parana                 | Argentina                | -                 |
| PAMPA-INTA             | Argentina                | Released cultivar |
| Olaeta Calandria       | Argentina                | Released cultivar |
| Sinvalocho             | Argentina                | Released cultivar |
| Cinquentenario         | Brazil                   | Released cultivar |
| Colonias               | Brazil                   | Released cultivar |
| Encruzilhada           | Brazil                   | Released cultivar |

| <b>Accession</b> | <b>Country of Origin</b> | <b>Status</b>     |
|------------------|--------------------------|-------------------|
| Fortaleza        | Brazil                   | Released cultivar |
| Frontana         | Brazil                   | Released cultivar |
| Fronteira        | Brazil                   | Released cultivar |
| Preludio         | Brazil                   | Released cultivar |
| Surpresa         | Brazil                   | Released cultivar |
| Toropi           | Brazil                   | Released cultivar |
| Trintecinco      | Brazil                   | Released cultivar |
| Tropeano         | Brazil                   | Released cultivar |
| Bage             | Brazil                   | Released cultivar |
| Combate          | Brazil                   | Released cultivar |
| Trintani         | Brazil                   | Released cultivar |
| Bola Picota      | Colombia                 | Released cultivar |
| Bonza            | Colombia                 | Released cultivar |
| CN12624          | Colombia                 | -                 |
| Menkemen         | Colombia                 | Released cultivar |
| Atacatzo 1       | Ecuador                  | -                 |
| CN11698          | Peru                     | -                 |
| CN12268          | Peru                     | -                 |
| CN12358          | Peru                     | -                 |
| Helvia           | Peru                     | Released cultivar |
| Maribal 50       | Peru                     | -                 |

| <b>Accession</b>     | <b>Country of Origin</b> | <b>Status</b>     |
|----------------------|--------------------------|-------------------|
| Americano 44D        | Uruguay                  | Released cultivar |
| Asia                 |                          | -                 |
| Chengdu Guangtou     | China                    | Landrace          |
| Fengcheung No. 1     | China                    | -                 |
| Fu Mai No 3          | China                    | Released cultivar |
| Ho chun No. 12       | China                    | -                 |
| Hsin ShuKuan#1       | China                    | -                 |
| Li Yang Wong Shu Bai | China                    | Released cultivar |
| Nan Tong DA Huang PI | China                    | Released cultivar |
| NING 7840            | China                    | -                 |
| NING 8026            | China                    | -                 |
| NING 8331            | China                    | Breeding line     |
| Shu Chou Wheat #3    | China                    | Released cultivar |
| Su Mai No 3          | China                    | Released cultivar |
| Xiang Mai No 1       | China                    | Released cultivar |
| Yang Mai No.1        | China                    | Released cultivar |
| Chinese Spring       | China                    | Landrace          |
| Girija               | India                    | Released cultivar |
| Kenphad 25           | India                    | Released cultivar |
| New Pusa             | India                    | -                 |
| Sonalika             | India                    | Released cultivar |

| <b>Accession</b>   | <b>Country of Origin</b> | <b>Status</b>     |
|--------------------|--------------------------|-------------------|
| Vijay              | India                    | Released cultivar |
| Surkh              | India                    | Landrace          |
| Azar               | Iran                     | Released cultivar |
| Rayhany            | Iran                     | -                 |
| Shahpassand        | Iran                     | -                 |
| Ajelea             | Iraq                     | -                 |
| Gogatsukomugai     | Japan                    | Released cultivar |
| Ikuzai #1          | Japan                    | Released cultivar |
| Nobeoka Bozu       | Japan                    | Landrace          |
| Norin 75           | Japan                    | Released cultivar |
| Nyu Bay            | Japan                    | Landrace          |
| Shinchunaga        | Japan                    | Landrace          |
| CN11204            | Jordan                   | -                 |
| Golubka            | Kazakhstan               | Released cultivar |
| karagandinskaja    | Kazakhstan               | Released cultivar |
| Koktunkulskaja 332 | Kazakhstan               | -                 |
| Krasnaja Svenzda   | Kazakhstan               | -                 |
| Ferrugineum-87     | Kyrgystan                | -                 |
| CN29854            | Nepal                    | -                 |
| CN29856            | Nepal                    | -                 |
| CN29858            | Nepal                    | -                 |

| <b>Accession</b> | <b>Country of Origin</b> | <b>Status</b>     |
|------------------|--------------------------|-------------------|
| CN29871          | Nepal                    | -                 |
| CN42522          | Nepal                    | -                 |
| CN10241          | Pakistan                 | -                 |
| CN12251          | Pakistan                 | -                 |
| CN30213          | Pakistan                 | -                 |
| CN9934           | Pakistan                 | -                 |
| CN9936           | Pakistan                 | -                 |
| 71GN No 115      | Syria                    | -                 |
| Africa           |                          | -                 |
| CN12666          | Congo                    | -                 |
| CN11720          | Egypt                    | -                 |
| CN12425          | Egypt                    | -                 |
| CN9794           | Egypt                    | -                 |
| Giza 141         | Egypt                    | Breeding line     |
| Camadi           | Ethiopia                 | Landrace          |
| CN11307          | Ethiopia                 | -                 |
| CN6024           | Ethiopia                 | -                 |
| CN6025           | Ethiopia                 | -                 |
| CN6030           | Ethiopia                 | -                 |
| CN10661          | Kenya                    | -                 |
| Equator          | Kenya                    | Released cultivar |

| <b>Accession</b>   | <b>Country of Origin</b> | <b>Status</b>     |
|--------------------|--------------------------|-------------------|
| CN10750            | Kenya                    | -                 |
| CN12388            | Kenya                    | -                 |
| Cobbs 1066         | Kenya                    | Released cultivar |
| Kenya 58           | Kenya                    | Released cultivar |
| Kenya Farmer       | Kenya                    | Released cultivar |
| Kenya Governor     | Kenya                    | Released cultivar |
| Kenya              | Kenya                    | Breeding line     |
| Daeraad            | South Africa             | Released cultivar |
| Dromedaris         | South Africa             | Released cultivar |
| Duiker             | South Africa             | Released cultivar |
| Penkop             | South Africa             | Released cultivar |
| Klein Trou         | South Africa             | Released cultivar |
| Koalisie           | South Africa             | Released cultivar |
| Europe             |                          | -                 |
| CN11461            | Austria                  | -                 |
| Fruher Tiroler Bin | Austria                  | -                 |
| Alfy 2             | Belgium                  | Released cultivar |
| Fylby              | Belgium                  | Released cultivar |
| Jufy 2             | Belgium                  | Released cultivar |
| Phoebus            | Belgium                  | Released cultivar |
| CN40750            | Bulgaria                 | -                 |



| <b>Accession</b>    | <b>Country of Origin</b> | <b>Status</b>     |
|---------------------|--------------------------|-------------------|
| Minskaja            | Bulgaria                 | -                 |
| Lada                | Bulgaria                 | Released cultivar |
| Maja                | CSK                      | Released cultivar |
| Sandra              | CSK                      | Released cultivar |
| Vega                | CSK                      | Released cultivar |
| KVL 2263            | Denmark                  | -                 |
| Etoile De Choisy    | France                   | Released cultivar |
| Ventura             | France                   | Released cultivar |
| Cargimarec          | France                   | Released cultivar |
| Bersee              | France                   | -                 |
| Hybride Du Jubile   | France                   | -                 |
| Werna               | France                   | Released cultivar |
| Prinqual            | France                   | Released cultivar |
| Froubou             | Germany                  | -                 |
| Heines Peko         | Germany                  | Released cultivar |
| Janetzki Fruher S   | Germany                  | Released cultivar |
| Hohenhein           | Germany                  | -                 |
| Janetzki Probat     | Germany                  | -                 |
| Strubes Fortschritt | Germany                  | Released cultivar |
| Funo                | Italy                    | Released cultivar |
| Falerio             | Italy                    | -                 |

| <b>Accession</b>    | <b>Country of Origin</b> | <b>Status</b>       |
|---------------------|--------------------------|---------------------|
| Mentana             | Italy                    | Released cultivar   |
| CN11642             | Poland                   | -                   |
| Magueija            | Portugal                 | Landrace            |
| Pirana              | Potrugal                 | Released cultivar   |
| Da Maia             | Portugal                 | Landrace            |
| Acadimia 48         | Romania                  | -                   |
| Dvina               | Russia                   | Released cultivar   |
| Gorkorskaja-15      | Russia                   | Released cultivar   |
| Narinskajal         | Russia                   | -                   |
| Pamjat Urala        | Russia                   | -                   |
| Severodvinskaja 1   | Russia                   | Released cultivar   |
| Udarnica            | Russia                   | Released cultivar   |
| Moskovka            | Russia                   | Released cultivar   |
| Irkutskaja 49       | Russia                   | -                   |
| Krasnokutka 3       | Russia                   | Unreleased cultivar |
| Onohoiskaja 4       | Russia                   | -                   |
| Ladoga              | Russia                   | Landrace            |
| Jakutjanka          | Russia                   | Released cultivar   |
| Krasnojarskaja 1103 | Russia                   | -                   |
| Pobeda              | Russia                   | Released cultivar   |
| Iskra               | Russia                   | Released cultivar   |

| <b>Accession</b>   | <b>Country of Origin</b> | <b>Status</b>     |
|--------------------|--------------------------|-------------------|
| Kamalinka          | Russia                   | Released cultivar |
| Ladoga             | Russia                   | Landrace          |
| Albimonte          | Switzerland              | Released cultivar |
| Dominator          | UK                       | Released cultivar |
| Holdfast           | UK                       | Released cultivar |
| Little Joss        | UK                       | Released cultivar |
| Red Marvel         | UK                       | Released cultivar |
| Squarhead's Master | UK                       | Released cultivar |
| Warden             | UK                       | Released cultivar |
| Musket             | UK                       | Released cultivar |
| Tonic              | UK                       | Released cultivar |
| Kinsman            | UK                       | -                 |
| DART               | UK                       | Released cultivar |
| Katja A1           | UK                       | Released cultivar |
| Setter             | UK                       | Released cultivar |
| Odessa kaja 13     | Ukraine                  | Released cultivar |
| Oceania            |                          | -                 |
| Comeback           | Australia                | Released cultivar |
| Bunyip             | Australia                | Released cultivar |
| cailloux           | Australia                | Released cultivar |
| BAART              | Australia                | Released cultivar |

| <b>Accession</b> | <b>Country of Origin</b> | <b>Status</b>     |
|------------------|--------------------------|-------------------|
| Bungulla         | Australia                | Released cultivar |
| Chara            | Australia                | Released cultivar |
| Federation       | Australia                | Released cultivar |
| Gabo             | Australia                | Released cultivar |
| Hard Federation  | Australia                | Released cultivar |
| Hofed            | Australia                | Released cultivar |
| John Brown       | Australia                | Released cultivar |
| Jumbuck          | Australia                | Released cultivar |
| Kukri            | Australia                | -                 |
| Major            | Australia                | Released cultivar |
| Pacific Bluestem | Australia                | Released cultivar |
| Sabre            | Australia                | Released cultivar |
| Sunstar          | Australia                | Released cultivar |
| White Federation | Australia                | Released cultivar |
| Warigo           | Australia                | Released cultivar |
| CD87             | Australia                | -                 |
| Bencubbin        | Australia                | Released cultivar |
| Sunbird          | Australia                | Released cultivar |
| Arawa            | New Zealand              | Released cultivar |
| CN12035          | New Zealand              | -                 |
| Endeavor         | New Zealand              | -                 |

| <b>Accession</b>        | <b>Country of Origin</b> | <b>Status</b>     |
|-------------------------|--------------------------|-------------------|
| Hilgendorf              | New Zealand              | Released cultivar |
| Oroua                   | New Zealand              | Released cultivar |
| Otane                   | New Zealand              | Released cultivar |
| Cross 7                 | New Zealand              | Released cultivar |
| Unknown                 |                          |                   |
| CN33802                 | Unknown                  | -                 |
| CN11739                 | Unknown                  | -                 |
| G3893                   | Unknown                  | -                 |
| CWI42988                | Unknown                  | -                 |
| CN12361                 | Unknown                  | -                 |
| Dorziyeh Karak          | Unknown                  | -                 |
| CN99032                 | Unknown                  | -                 |
| CN9940                  | Unknown                  | -                 |
| Kostoff's Triple Hybrid | Unknown                  | -                 |
| CN12213                 | Unknown                  | -                 |
| CN33892                 | Unknown                  | -                 |
| CN33893                 | Unknown                  | -                 |
| CN2758                  | Unknown                  | -                 |
| CN11647                 | Unknown                  | -                 |
| CN33803                 | Unknown                  | -                 |
| CN32504                 | Unknown                  | -                 |

---

| <b>Accession</b> | <b>Country of Origin</b> | <b>Status</b> |
|------------------|--------------------------|---------------|
| CN12442          | Unknown                  | -             |
| CN1849           | Unknown                  | -             |
| CN12261          | Unknown                  | -             |
| Kozlodui         | Unknown                  | -             |
| Dorziyey Safra   | Unknown                  | -             |
| CN6171           | Unknown                  | -             |
| Tambillo 1       | Unknown                  | -             |
| Indur Compactum  | Unknown                  | -             |
| CN37599          | Unknown                  | -             |
| CN12229          | Unknown                  | -             |
| CN40895          | Unknown                  | -             |

---

**Table S2.** Primer names, sequences, PCR conditions, amplicon sizes and references for four *Lr* gene specific markers

| Gene        | Primer Name   | Sequence                  | PCR condition                                                                                                                                                                              | Resolution method | Amplicon sizes | Reference                   |
|-------------|---------------|---------------------------|--------------------------------------------------------------------------------------------------------------------------------------------------------------------------------------------|-------------------|----------------|-----------------------------|
| <i>Lr1</i>  | Glenlea5_F233 | AGTCTGCACAATCTTTTCCGG     | Initial denaturation: 94°C, 4 min<br>Denaturation: 94°C, 15 sec<br>Annealing: 65°C, 30 sec<br>Extention: 72°C, 30 sec<br>Cycles: 35<br>Final extension: 72°C, 10 min<br>End: 15°C constant | 1.5% agarose gel  | 500/N          | Cloutier et al. 2007        |
|             | Glenlea5_R712 | ATCTGTAGTTGGTCCACCAAGG    |                                                                                                                                                                                            |                   |                |                             |
| <i>Lr10</i> | Lrk10D1       | GAAGCCCTTCGTCTCATCTG      | Initial denaturation: 94°C, 3 min<br>Denaturation: 94°C, 45 sec<br>Annealing: 57°C, 45 sec<br>Extention: 72°C, 30 min<br>Cycles: 35<br>Final extension: 72°C, 10 min<br>End: 15°C constant | 1.5% agarose gel  | 300/400/500    | Schachermayr et al.<br>1997 |
|             | Lrk10D2       | TTGATTCATTGCAGATGAGATCACG |                                                                                                                                                                                            |                   |                |                             |

| Gene        | Primer Name | Sequence                | PCR condition                                                                                                                                                                            | Resolution method | Amplicon sizes | Reference           |
|-------------|-------------|-------------------------|------------------------------------------------------------------------------------------------------------------------------------------------------------------------------------------|-------------------|----------------|---------------------|
| <i>Lr21</i> | Lr21-227F   | TATTTGACATCAGTCATTGAGG  | Initial denaturation: 95°C, 5 min<br>Denaturation: 95°C, 1 min<br>Annealing: 54°C, 1 min<br>Extention: 72°C, 1 min<br>Cycles: 34<br>Final extension: 72°C, 10 min<br>End: 15°C constant  | 1.5% agarose gel  | 400/N          | Huang and Gill 2001 |
|             | Lr21-550R   | CATCTTGAGATAGCAGTAAGG   |                                                                                                                                                                                          |                   |                |                     |
| <i>Lr34</i> | caIND11     | F: GTCTCCCAATCTGCATGCTC | Initial denaturation: 93°C, 2 min<br>Denaturation: 94°C, 1 min<br>Annealing: 58°C, 50 sec<br>Extention: 72°C, 1 min<br>Cycles: 30<br>Final extension: 72°C, 10 min<br>End: 15°C constant | ABI3130x1         | 394/397        | Dakouri et al. 2010 |
|             |             | R: TACCTCCCAAAGCCAGTTG  |                                                                                                                                                                                          |                   |                |                     |



| Gene | Primer Name | Sequence                                           | PCR condition                                                                                                                                                                            | Resolution method | Amplicon sizes                         | Reference |
|------|-------------|----------------------------------------------------|------------------------------------------------------------------------------------------------------------------------------------------------------------------------------------------|-------------------|----------------------------------------|-----------|
|      | caSNP4      | F: GCGTTTCTGTCACCAGAAGT<br>R: AATAAACTCGCGCCTCTTGA | Initial denaturation: 94°C, 5 min<br>Denaturation: 94°C, 1 min<br>Annealing: 65°C, 30 sec<br>Extention: 72°C, 1 min<br>Cycles: 35<br>Final extension: 72°C, 10 min<br>End: 15°C constant | 1.5% agarose gel  | 390/N<br><br><br><br><br><br><br>234/N |           |
|      | caSNP12     | F: TCCCCAGTTTAACCATCCTG<br>R: CATTCAAGTCACCTCGCAGC |                                                                                                                                                                                          |                   |                                        |           |

**Table S3.** Seedling resistance gene postulation based on the infection types of 10 races of *P. triticina* and molecular data, and evaluation of maximum rust severity and host response of a world collection of 275 wheat accessions

| Accession name       | Seedling genes | BBBD | MBDS | MGBJ | TJBJ | TDBG | MBRJ | PBDQ | THMJ | TNRJ | TCRJ | Marker data |             |             | MRS | SE | HR   |     |     |
|----------------------|----------------|------|------|------|------|------|------|------|------|------|------|-------------|-------------|-------------|-----|----|------|-----|-----|
|                      |                |      |      |      |      |      |      |      |      |      |      | <i>Lr1</i>  | <i>Lr10</i> | <i>Lr34</i> |     |    | WPG  | GLN | POR |
| Group1               |                |      |      |      |      |      |      |      |      |      |      |             |             |             |     |    |      |     |     |
| Neepawa              | none           | 3    | 3    | 3    | 3    | 33+  | 33+  | 33+  | 3    | 33+  | 3    |             |             |             | 61  | 4  | MRMS | S   | S   |
| Kanred               | none           | 3    | 3    | 3    | 3    | 3    | 3    | 33+  | 3    | 33+  | 3    |             |             |             | 4   | 1  | R    | MS  | R   |
| Chinese Spring       | none           | 3    | 3    | 3    | 3    | 3+   | 3    | 33+  | 3    | 33+  | 3    |             | <i>Lr34</i> | 2           | 1   | MS | ?    | R   |     |
| CN33802              | none           | 3    | 3    | 3    | 3    | 4    | 33+  | 33+  | 3    | 3    | 3    |             |             |             | 78  | 3  | ?    | ?   | MS  |
| CN11739              | none           | 3    | 3    | 3    | 3    | 33+  | 33+  | 33+  | 3    | 3    | 3    |             |             |             | 70  | 4  | S    | MSS | MSS |
| G3893                | none           | 3    | 3    | 3    | 3    | 33+  | 33+  | 3    | 3    | 3    | 3    |             |             |             | 30  | 5  | MR   | MSS | S   |
| CWI42988             | none           | 3    | 3    | 3    | 3    | 33+  | 3    | 33+  | 3    | 3    | 3    |             |             |             | 41  | 5  | MRMS | MS  | R   |
| Surkh                | none           | 3    | 3    | 3    | 3    | 33+  | 33+  | 3    | 3    | 3    | 3    |             |             |             | 78  | 2  | S    | S   | S   |
| Li Yang Wong Shu Bai | none           | 3    | 3    | 3    | 3    | 33+  | 3    | 33+  | 3    | 3    | 3    |             | <i>Lr34</i> | 4           | 1   | MS | R    | MS  |     |
| Ajelea               | none           | 3    | 3    | 3    | 3    | 33+  | 33+  | 33+  | 3    | 3    | 3    |             |             |             | 2   | 1  | ?    | R   | R   |
| Nyu Bay              | none           | 3    | 3    | 3    | 3    | 33+  | 33+  | 33+  | 3    | 3    | 3    |             | <i>Lr34</i> | 14          | 3   | MS | MS   | MS  |     |
| CN29856              | none           | 3    | 3    | 3    | 3    | 43+  | 33+  | 33+  | 3    | 3    | 3    |             |             |             | 63  | 3  | MS   | S   | MS  |

| Accession name   | Seedling genes | BBBD | MBDS | MGBJ | TBJJ | TDBG | MBRJ | PBDQ | THMJ | TNRJ | TCRJ | Marker data |             |             | MRS | SE | HR   |     |     |
|------------------|----------------|------|------|------|------|------|------|------|------|------|------|-------------|-------------|-------------|-----|----|------|-----|-----|
|                  |                |      |      |      |      |      |      |      |      |      |      | <i>Lr1</i>  | <i>Lr10</i> | <i>Lr34</i> |     |    | WPG  | GLN | POR |
| CN29854          | none           | 3    | 3    | 3    | 3    | 33+  | 33+  | 33+  | 3    | 3    | 3    |             |             |             | 53  | 4  | S    | S   | MSS |
| CN9934           | none           | 3    | 3    | 3    | 3    | 33+  | 33+  | 3    | 3    | 3    | 3    |             |             |             | 21  | 4  | R    | R   | MS  |
| CN9936           | none           | 3    | 3    | 3    | 3    | 33+  | 3    | 33+  | 3    | 3    | 3    |             |             |             | 40  | 8  | R    | MS  | MS  |
| CN12251          | none           | 3    | 3    | 3    | 3    | 33+  | 33+  | 3    | 3    | 3    | 3    |             |             |             | 13  | 6  | MRMS | R   | MR  |
| Dvina            | none           | 3    | 3    | 3    | 3    | 33+  | 33+  | 3    | 3    | 3    | 3    |             |             |             | 70  | 6  | S    | S   | S   |
| Golubka          | none           | 3    | 3    | 3    | 3    | 33+  | 33+  | 33+  | 3    | 3    | 3    |             |             |             | 36  | 6  | ?    | MS  | MS  |
| Gorkorskaja15    | none           | 3    | 3    | 3    | 3    | 3    | 33+  | 33+  | 3    | 3    | 3    |             |             |             | 25  | 3  | MRMS | MS  | MS  |
| Narinskajal      | none           | 3    | 3    | 3    | 3    | 33+  | 33+  | 33+  | 3    | 3    | 3    |             |             |             | 66  | 5  | S    | S   | S   |
| Odess kaja 13    | none           | 3    | 3    | 3    | 3    | 3    | 33+  | 33+  | 3    | 3    | 3    |             |             |             | 48  | 7  | S    | S   | S   |
| Pamjat Urala     | none           | 3    | 3    | 3    | 3    | 33+  | 33+  | 33+  | 3    | 3    | 3    |             |             |             | 65  | 4  | MSS  | S   | S   |
| Severodvinskaja1 | none           | 3    | 3    | 3    | 3    | 33+  | 33+  | 33+  | 3    | 3    | 3    |             |             |             | 70  | 6  | S    | S   | S   |
| Udarnica         | none           | 3    | 3    | 3    | 3    | 33+  | 33+  | 33+  | 3    | 3    | 3    |             |             |             | 65  | 7  | S    | S   | S   |
| CN11461          | none           | 3    | 3    | 3    | 3    | 3    | 33+  | 33+  | 3    | 3    | 3    |             |             |             | 41  | 4  | S    | S   | MSS |
| Comeback         | none           | 3    | 3    | 3    | 3    | 33+  | 33+  | 33+  | 3    | 3    | 3    |             |             |             | 56  | 5  | MS   | S   | S   |
| Fylby            | none           | 3    | 3    | 3    | 3    | 33-  | 33+  | 33+  | 3    | 3    | 3    |             |             |             | 57  | 4  | S    | S   | S   |
| CN40750          | none           | 3    | 3    | 3    | 3    | 33-  | 33+  | 3    | 3    | 3    | 3    |             |             |             | 50  | 3  | MRMS | MS  | S   |

| Accession name   | Seedling genes | BBBD | MBDS | MGBJ | TBJJ | TDBG | MBRJ | PBDQ | THMJ | TNRJ | TCRJ | Marker data |             |             | MRS | SE  | HR  |     |     |
|------------------|----------------|------|------|------|------|------|------|------|------|------|------|-------------|-------------|-------------|-----|-----|-----|-----|-----|
|                  |                |      |      |      |      |      |      |      |      |      |      | <i>Lr1</i>  | <i>Lr10</i> | <i>Lr34</i> |     |     | WPG | GLN | POR |
| Lada             | none           | 3    | 3    | 3    | 3    | 33-  | 33+  | 3    | 3    | 3    | 3    |             |             | 9           | 3   | MR  | R   | MS  |     |
| Falerio          | none           | 3    | 3    | 3    | 3    | 33+  | 33+  | 3    | 3    | 3    | 3    |             | <i>Lr34</i> | 21          | 6   | MSS | R   | R   |     |
| Albimonte        | none           | 3    | 3    | 3    | 3    | 33+  | 33+  | 33+  | 3    | 3    | 3    |             | <i>Lr34</i> | 7           | 2   | MSS | R   | MS  |     |
| CN11642          | none           | 3    | 3    | 3    | 3    | 33+  | 33+  | 3    | 3    | 3    | 3    |             |             | 39          | 6   | S   | S   | MS  |     |
| CN12361          | none           | 3    | 3    | 3    | 3    | 33+  | 33+  | 33+  | 3    | 33+  | 3    |             |             | 52          | 5   | MS  | ?   | ?   |     |
| CN11720          | none           | 3    | 3    | 3    | 3    | 33+  | 33+  | 3    | 3    | 3    | 3    |             |             | 38          | 7   | MS  | MS  | MS  |     |
| CN10661          | none           | 3    | 3    | 3    | 3    | 33+  | 33+  | 3    | 3    | 3    | 3    |             | <i>Lr34</i> | 35          | 5   | ?   | MS  | MS  |     |
| Bunyip           | none           | 3    | 3    | 3    | 3    | 33+  | 33+  | 3    | 3    | 3    | 3    |             |             | 57          | 5   | S   | S   | MS  |     |
| Bungulla         | none           | 3    | 3    | 3    | 3    | 33+  | 33+  | 3    | 3    | 3    | 3    |             |             | 46          | 6   | MS  | S   | MS  |     |
| Vijay            | none           | 3    | 3    | 3    | 3    | 33+  | 3    | 33+  | 3    | ?    | 3    |             |             | 24          | 4   | MS  | S   | R   |     |
| Dorziyeh karak   | none           | 33+  | 3    | 33-  | ?    | 33+  | 3    | 3    | 3    | 3    | 3    |             |             | 6           | 1   | ?   | R   | ?   |     |
| Krasnaja Svenzda | none           | 3    | 3    | 33-  | 33+  | 33+  | 33+  | 33+  | 3    | 3    | 3    |             |             | 54          | 5   | MS  | S   | S   |     |
| Group2           |                |      |      |      |      |      |      |      |      |      |      |             |             |             |     |     |     |     |     |
| CN99032          | <i>N</i>       | 3    | 3    | 2    | 3    | 33+  | 3    | 33+  | 3    | 3    | 3    |             |             | 1           | 0   | R   | R   | R   |     |
| Preludio         | <i>N</i>       | 3    | 3    | 3    | 1    | 33+  | 33+  | 3    | 3    | 33+  | 3    |             |             | 3           | 1   | MR  | R   | R   |     |
| Kenya Farmer     | <i>N</i>       | 3    | 2    | 3    | 3    | 3    | 33+  | 3    | 3    | 3    | 3    |             |             | 28          | 4   | MR  | R   | MS  |     |

| Accession name          | Seedling genes | BBBD | MBDS | MGBJ | TBJJ | TDBG | MBRJ | PBDQ | THMJ | TNRJ | TCRJ | Marker data |             |             | MRS | SE | HR   |      |     |
|-------------------------|----------------|------|------|------|------|------|------|------|------|------|------|-------------|-------------|-------------|-----|----|------|------|-----|
|                         |                |      |      |      |      |      |      |      |      |      |      | <i>Lr1</i>  | <i>Lr10</i> | <i>Lr34</i> |     |    | WPG  | GLN  | POR |
| Santa Elena             | <i>N</i>       | 33+  | 3    | 3    | 3    | 21   | 3    | 3    | 3    | 3    | 3    |             |             |             | 53  | 5  | MS   | R    | MS  |
| CN9940                  | <i>N</i>       | 3    | 2    | 33-  | 3    | 33+  | 3    | 33+  | 3    | 3    | 3    |             |             |             | 10  | 2  | MRMS | MS   | R   |
| Beloglina               | <i>N</i>       | 3    | 3    | 3    | 3    | 33-  | 3    | ;2   | 3    | 3    | 3    |             |             |             | 34  | 4  | S    | S    | ?   |
| StrubesFortschritt      | <i>N</i>       | 3    | 3    | 33-  | 3    | 33+  | 33+  | ;1   | 3    | 3    | 3    |             |             |             | 42  | 5  | MS   | MS   | MS  |
| Atacatzto 1             | <i>N</i>       | 3    | 3    | 3    | 33+  | 33+  | 33+  | ;1   | 3    | 3    | 3    |             |             |             | 76  | 3  | S    | S    | S   |
| CN10750                 | <i>N</i>       | 3    | 3    | 2    | 2    | 33+  | 33+  | 3    | 3    | 3    | 3    |             |             |             | 44  | 6  | MSS  | MSS  | S   |
| Klein Credito           | <i>N</i>       | 3    | 2    | 1    | 2    | 33+  | 3    | 33+  | 3    | 3    | 3    |             |             |             | 17  | 3  | MR   | MS   | MS  |
| CN12624                 | <i>N</i>       | 3    | 3    | 2    | 2    | 33+  | 2    | 3    | ;12  | 3    | 3    |             |             |             | 7   | 2  | MR   | R    | R   |
| Group 3                 |                |      |      |      |      |      |      |      |      |      |      |             |             |             |     |    |      |      |     |
| Subgroup 1              |                |      |      |      |      |      |      |      |      |      |      |             |             |             |     |    |      |      |     |
| Red River 68            | <i>Lr1</i>     | 0    | 3    | 3    | 1    | 33+  | 3    | 33+  | 3    | 33+  | 3    | <i>Lr1</i>  |             |             | 13  | 3  | MR   | MRMS | MS  |
| Shu Chou Wheat #3       | <i>Lr1</i>     | ;    | 3    | 3    | 3    | 33+  | 33+  | 3    | 33+  | 3    | 3    | <i>Lr1</i>  | <i>Lr34</i> |             | 21  | 3  | MS   | MSS  | MSS |
| Shinchunaga             | <i>Lr1</i>     | 2    | 3    | 3    | 3    | 33+  | 33+  | 3    | 3    | 3    | 3    | <i>Lr1</i>  |             |             | 37  | 5  | MSS  | MSS  | MS  |
| Kostoff's Triple hybrid | <i>Lr1</i>     | 1    | 3    | 3    | 3    | 3    | 33+  | 33+  | 3    | 3    | 3    | <i>Lr1</i>  |             |             | 29  | 4  | MS   | S    | MS  |
| Iskra                   | <i>Lr1</i>     | 2    | 3    | 3    | 3    | 33+  | 33+  | 33+  | 3    | 3    | 3    | <i>Lr1</i>  |             |             | 56  | 6  | R    | MR   | ?   |

| Accession name     | Seedling genes | BBBD | MBDS | MGBJ | TJBj | TDBG | MBRJ | PBDQ | THMJ | TNRJ | TCRJ | Marker data |             |             | MRS | SE  | HR   |     |     |
|--------------------|----------------|------|------|------|------|------|------|------|------|------|------|-------------|-------------|-------------|-----|-----|------|-----|-----|
|                    |                |      |      |      |      |      |      |      |      |      |      | <i>Lr1</i>  | <i>Lr10</i> | <i>Lr34</i> |     |     | WPG  | GLN | POR |
| Fruher Tiroler Bin | <i>Lr1</i>     | 2    | 3    | 3    | 3    | 3    | 33+  | 33+  | 3    | 3    | 3    | <i>Lr1</i>  |             | 51          | 5   | MS  | MSS  | S   |     |
| Ventura            | <i>Lr1</i>     | 1    | 3    | 3    | 3    | 33+  | 33+  | 3    | 3    | 3    | 3    | <i>Lr1</i>  |             | 44          | 6   | MS  | S    | S   |     |
| Endeavor           | <i>Lr1</i>     | 0    | 3    | 3    | 3    | 3    | 33+  | 3    | 3    | 3    | 3    | <i>Lr1</i>  |             | 29          | 6   | MS  | MS   | S   |     |
| cailloux           | <i>Lr1</i>     | 3    | 3    | 3    | 3    | 33+  | 33+  | 33+  | 3    | 33+  | 3    | <i>Lr1</i>  |             | 55          | 3   | ?   | S    | S   |     |
| CN12213            | <i>Lr1</i>     | 3    | 3    | 3    | 3    | 33+  | 33+  | 33+  | 3    | 3    | 3    | <i>Lr1</i>  |             | 65          | 4   | MSS | MSS  | S   |     |
| Shahpassand        | <i>Lr1</i>     | 3    | 3    | 3    | 3    | 33+  | 33+  | 33+  | 3    | 3    | 3    | <i>Lr1</i>  |             | 84          | 2   | S   | S    | ?   |     |
| Moskovka           | <i>Lr1</i>     | 3    | 3    | 3    | 3    | 33+  | 33+  | 33+  | 3    | 3    | 3    | <i>Lr1</i>  | <i>Lr34</i> | 53          | 5   | MS  | MS   | S   |     |
| Buffum             | <i>Lr1</i>     | 3    | 3    | 3    | 3    | 33-  | 33+  | 3    | 3    | 3    | 3    | <i>Lr1</i>  |             | 48          | 4   | ?   | S    | S   |     |
| Maja               | <i>Lr1</i>     | 3    | 3    | 3    | 3    | 33+  | 33+  | 3    | 3    | 3    | 3    | <i>Lr1</i>  |             | 48          | 4   | MS  | S    | S   |     |
| Kinsman            | <i>Lr1</i>     | 3    | 3    | 3    | 3    | 3+   | 33+  | 3    | 3    | 3    | 3    | <i>Lr1</i>  |             | 8           | 3   | ?   | S    | S   |     |
| Heines Peko        | <i>Lr1</i>     | 3    | 3    | 3    | 3    | 33+  | 33+  | 3    | 3    | 3    | 3    | <i>Lr1</i>  |             | 32          | 6   | S   | MSS  | MSS |     |
| CN12425            | <i>Lr1</i>     | 3    | 3    | 3    | 3    | 3    | 33+  | 3    | 3    | 3    | 3    | <i>Lr1</i>  |             | 16          | 4   | MR  | R    | R   |     |
| Ho chun No. 12     | <i>Lr10</i>    | 2    | 3    | 3    | 3    | 33+  | 33+  | 33+  | 3    | 3    | 3    |             | <i>Lr10</i> | 48          | 5   | MS  | S    | MS  |     |
| Etoile De Choisy   | <i>Lr10</i>    | 2    | 3    | 3    | 3    | 33+  | 33+  | 33+  | 3    | 3    | 3    |             | <i>Lr10</i> | 58          | 6   | S   | MS   | S   |     |
| Magueija           | <i>Lr10</i>    | 2    | 3    | 3    | 3    | 33+  | 33+  | 3    | 3    | 3    | 3    |             | <i>Lr10</i> | <i>Lr34</i> | 3   | 2   | R    | ?   | R   |
| Bonza              | <i>Lr10</i>    | 0    | 3    | 3    | 3    | 33+  | 33+  | 3    | 3    | 3    | 3    |             | <i>Lr10</i> | <i>Lr34</i> | 18  | 4   | MRMS | R   | 5jw |

| Accession name  | Seedling genes | BBBD | MBDS | MGBJ | TJBJ | TDBG | MBRJ | PBDQ | THMJ | TNRJ | TCRJ | Marker data |             |             | MRS | SE   | HR  |     |     |
|-----------------|----------------|------|------|------|------|------|------|------|------|------|------|-------------|-------------|-------------|-----|------|-----|-----|-----|
|                 |                |      |      |      |      |      |      |      |      |      |      | <i>Lr1</i>  | <i>Lr10</i> | <i>Lr34</i> |     |      | WPG | GLN | POR |
| Chara           | <i>Lr10</i>    | 2    | 3    | 3    | 3    | 33+  | 33+  | 3    | 3    | 3    | 3    | <i>Lr10</i> | <i>Lr34</i> | 30          | 6   | ?    | S   | ?   |     |
| Federation      | <i>Lr10</i>    | 1    | 3    | 3    | 3    | 33+  | 33+  | 3    | 3    | 3    | 3    | <i>Lr10</i> |             | 60          | 6   | MS   | S   | MSS |     |
| CN33892         | <i>Lr10</i>    | 2    | 3    | 3    | 3    | 33+  | ?    | 33+  | 3    | 3    | 3    | <i>Lr10</i> |             | 25          | 5   | S    | S   | R   |     |
| CN33893         | <i>Lr10</i>    | 3    | 3    | 3    | 3    | 33+  | 33+  | 33+  | 3    | 3    | 3    | <i>Lr10</i> |             | 7           | 3   | R    | R   | R   |     |
| Kenphad 25      | <i>Lr10</i>    | 3    | 3    | 3    | 3    | 33+  | 3    | 33+  | 3    | 3    | 3    | <i>Lr10</i> |             | 46          | 4   | MRMS | MSS | MSS |     |
| Sonalika        | <i>Lr10</i>    | 33+  | 3    | 3    | 3    | 3    | 33+  | 33+  | 3    | 3    | 3    | <i>Lr10</i> |             | 47          | 6   | MS   | S   | R   |     |
| Irkutskaja 49   | <i>Lr10</i>    | 3    | 3    | 3    | 3    | 33+  | 33+  | 33+  | 3    | 3    | 3    | <i>Lr10</i> |             | 67          | 6   | S    | S   | S   |     |
| Krasnokutka 3   | <i>Lr10</i>    | 3    | 3    | 3    | 3    | 33+  | 33+  | 3    | 3    | 3    | 3    | <i>Lr10</i> |             | 72          | 4   | MSS  | S   | S   |     |
| CN9794          | <i>Lr10</i>    | 3    | 3    | 3    | 3    | 33+  | 3    | 33+  | 3    | 3    | 3    | <i>Lr10</i> |             | 25          | 6   | ?    | ?   | R   |     |
| Hard Federation | <i>Lr10</i>    | 3    | 3    | 3    | 3    | 33+  | 33+  | 3    | 3    | 3    | 3    | <i>Lr10</i> |             | 50          | 5   | S    | S   | MS  |     |
| Hofed           | <i>Lr10</i>    | 3    | 3    | 3    | 3    | 33+  | 3    | 3    | 3    | 3    | 3    | <i>Lr10</i> |             | 44          | 4   | MRMS | S   | S   |     |
| Sinvalocho      | <i>Lr3</i>     | 0    | 3    | 3    | 3    | 33+  | 33+  | 3    | 3    | 33+  | 3    |             | <i>Lr34</i> | 18          | 3   | S    | MS  | R   |     |
| CN2758          | <i>Lr3</i>     | 1    | 3    | 3    | 3    | 33+  | 33+  | 33+  | 3    | 33+  | 33+  |             |             | 7           | 2   | MS   | MS  | MS  |     |
| CN11647         | <i>Lr3</i>     | 2    | 3    | 3    | 3    | 33+  | 33+  | 33+  | 3    | 3    | 3    |             |             | 43          | 6   | S    | S   | S   |     |
| CN33803         | <i>Lr3</i>     | 2    | 3    | 3    | 3    | 33+  | 33+  | 33+  | 3    | 3    | 3    |             |             | 17          | 5   | MS   | R   | R   |     |
| Su Mai No 3     | <i>Lr3</i>     | 1    | 3    | 3    | 3    | 33+  | 33+  | 3    | 3    | 3    | 3    |             | <i>Lr34</i> | 47          | 7   | S    | S   | S   |     |

| Accession name   | Seedling genes | BBBD | MBDS | MGBJ | TJBJ | TDBG | MBRJ | PBDQ | THMJ | TNRJ | TCRJ | Marker data |             |             | MRS | SE | HR  |     |     |
|------------------|----------------|------|------|------|------|------|------|------|------|------|------|-------------|-------------|-------------|-----|----|-----|-----|-----|
|                  |                |      |      |      |      |      |      |      |      |      |      | <i>Lr1</i>  | <i>Lr10</i> | <i>Lr34</i> |     |    | WPG | GLN | POR |
| Azar             | <i>Lr3</i>     | 2    | 3    | 3    | 3    | 33+  | 33+  | 3    | 3    | 3    | 3    |             |             |             | 73  | 3  | S   | S   | S   |
| Norin 75         | <i>Lr3</i>     | 2    | 3    | 3    | 3    | 33+  | 3    | 4    | 3    | 3    | 3    |             |             |             | 71  | 4  | ?   | ?   | S   |
| Nobeoka Bozu     | <i>Lr3</i>     | 2    | 3    | 3    | 3    | 33+  | 33+  | 33+  | 3    | 3    | 3    |             | <i>Lr34</i> | 14          | 2   | MS | MS  | S   |     |
| Ikuzai #1        | <i>Lr3</i>     | 2    | 3    | 3    | 3    | 33+  | 33+  | 33+  | 3    | 3    | 3    |             | <i>Lr34</i> | 42          | 7   | ?  | S   | ?   |     |
| CN42522          | <i>Lr3</i>     | 2    | 3    | 3    | 3    | 33+  | 33+  | 3    | 3    | 3    | 3    |             |             | 70          | 3   | MS | R   | MS  |     |
| CN29871          | <i>Lr3</i>     | 2    | 3    | 3    | 3    | 33+  | 33+  | 33+  | 3    | 3    | 3    |             |             | 61          | 5   | MS | R   | MS  |     |
| CN29858          | <i>Lr3</i>     | 2    | 3    | 3    | 3    | 33+  | 33+  | 33+  | 3    | 3    | 3    |             |             | 69          | 2   | S  | S   | S   |     |
| CN10241          | <i>Lr3</i>     | 2    | 3    | 3    | 3    | 33+  | 33+  | 3    | 3    | 3    | 3    |             |             | 15          | 4   | ?  | R   | ?   |     |
| Ferrugineum87    | <i>Lr3</i>     | 2    | 3    | 3    | 3    | 33+  | 33+  | 33+  | 3    | 3    | 3    |             |             | 18          | 3   | MS | MS  | MS  |     |
| karagandinskaja  | <i>Lr3</i>     | 2    | 3    | 3    | 3    | 33+  | 33+  | 33+  | 3    | 3    | 3    |             |             | 44          | 6   | MS | MS  | MSS |     |
| Vega             | <i>Lr3</i>     | 2    | 3    | 3    | 3    | 33+  | 33+  | 33+  | 3    | 3    | 3    |             |             | 46          | 5   | ?  | S   | MSS |     |
| 71GN No 115      | <i>Lr3</i>     | 2    | 3    | 3    | 3    | 3    | 33+  | 33+  | 3    | 3    | 3    |             |             | 51          | 7   | MR | MS  | MS  |     |
| Sandra           | <i>Lr3</i>     | 1    | 3    | 3    | 3    | 33+  | 33+  | 3    | 3    | 3    | 3    |             |             | 51          | 4   | MS | S   | S   |     |
| CN32504          | <i>Lr3</i>     | 2    | 3    | 3    | 3    | 33+  | 33+  | 3    | 3    | 3    | 3    |             | <i>Lr34</i> | 31          | 6   | S  | RMR | R   |     |
| Argentina        | <i>Lr3</i>     | 1    | 3    | 3    | 3    | 33+  | 33+  | 3    | 3    | 3    | 3    |             | <i>Lr34</i> | 17          | 5   | MS | R   | R   |     |
| Klein otto Wulff | <i>Lr3</i>     | 0    | 3    | 3    | 3    | 33+  | 33+  | 3    | 3    | 3    | 3    |             |             | 17          | 4   | MS | MSS | MS  |     |



| Accession name  | Seedling genes | BBBD | MBDS | MGBJ | TBJJ | TDBG | MBRJ | PBDQ | THMJ | TNRJ | TCRJ | Marker data |             |             | MRS | SE   | HR  |     |     |
|-----------------|----------------|------|------|------|------|------|------|------|------|------|------|-------------|-------------|-------------|-----|------|-----|-----|-----|
|                 |                |      |      |      |      |      |      |      |      |      |      | <i>Lr1</i>  | <i>Lr10</i> | <i>Lr34</i> |     |      | WPG | GLN | POR |
| CN11307         | <i>Lr3</i>     | ;    | 3    | 3    | 3    | 33+  | 33+  | 3    | 3    | 3    | 3    |             |             |             | 52  | 6    | S   | S   | MS  |
| Gabo            | <i>Lr3</i>     | 1    | 3    | 3    | 3    | 33+  | 33+  | 3    | 3    | 3    | 3    |             |             |             | 59  | 3    | MS  | S   | S   |
| Hilgendorf      | <i>Lr3</i>     | 1    | 3    | 3    | 3    | 33+  | 3    | 3    | 3    | 3    | 3    |             | <i>Lr34</i> | 1           | 0   | MS   | R   | R   |     |
| Sunbird         | <i>Lr9</i>     | 0    | ;    | ;    | 0    | 23   | 0    | x    | ;    | 3    | ;    |             | <i>Lr34</i> | 35          | 6   | MS   | R   | MS  |     |
| Onohoiskaja 4   | <i>Lr20</i>    | 3    | 3    | 3    | 3    | 22+  | 33+  | 33+  | 3    | 3    | 3    |             |             |             | 45  | 4    | MS  | MS  | S   |
| Ladoga          | <i>Lr20</i>    | 3    | 3    | 3    | 3    | X    | 33+  | 33+  | 3    | 3    | 3    |             |             |             | 55  | 5    | S   | S   | S   |
| Janetzki Probat | <i>Lr20</i>    | 3    | 3    | 3    | 3    | 22+  | 33+  | 3    | 3    | 3    | 3    |             |             |             | 41  | 5    | MSS | S   | S   |
| Da Maia         | <i>Lr20</i>    | 3    | 3    | 3    | 3    | 22+  | 33+  | 3    | 3    | 3    | 3    |             |             |             | 41  | 4    | MS  | MSS | MS  |
| Red Marvel      | <i>Lr20</i>    | 3    | 3    | 3    | 3    | 22+  | 33+  | 33+  | 3    | 3    | 3    |             |             |             | 12  | 4    | MS  | R   | ?   |
| Little Joss     | <i>Lr20</i>    | 3    | 3    | 3    | 3    | 22+  | 33+  | 3    | 3    | 3    | 3    |             |             |             | 46  | 6    | MS  | MS  | MSS |
| Holdfast        | <i>Lr20</i>    | 3    | 3    | 3    | 3    | 22+  | 33+  | 3    | 3    | 3    | 3    |             |             |             | 1   | 0    | MS  | R   | MS  |
| CN6030          | <i>Lr20</i>    | 3    | 3    | 3    | 3    | 22+  | 33+  | 3    | 3    | 3    | 3    |             | <i>Lr34</i> | 41          | 7   | MR   | S   | MS  |     |
| John Brown      | <i>Lr20</i>    | 33+  | 3    | 3    | 3    | 2    | 33+  | 3    | 3    | 3    | 3    |             | <i>Lr34</i> | 43          | 5   | MRMS | S   | S   |     |
| Cross 7         | <i>Lr20</i>    | 3    | 3    | 3    | 3    | ;    | 33+  | 3    | 3    | 3    | 3    |             |             |             | 39  | 7    | MS  | MS  | S   |
| Oroua           | <i>Lr20</i>    | 3    | 3    | 3    | 3    | 21   | 33+  | 3    | 3    | 3    | 3    |             |             |             | 14  | 2    | MR  | MS  | MS  |
| Giza 141        | <i>Lr20</i>    | 3    | 3    | 3    | ?    | 22+  | 33+  | 33+  | 3    | 3    | 3    |             |             |             | 18  | 5    | ?   | MSS | R   |

| Accession name      | Seedling genes   | BBBD | MBDS | MGBJ | TJBj | TDBG | MBRJ | PBDQ | THMJ | TNRJ | TCRJ | Marker data |             |             | MRS | SE | HR  |     |     |
|---------------------|------------------|------|------|------|------|------|------|------|------|------|------|-------------|-------------|-------------|-----|----|-----|-----|-----|
|                     |                  |      |      |      |      |      |      |      |      |      |      | <i>Lr1</i>  | <i>Lr10</i> | <i>Lr34</i> |     |    | WPG | GLN | POR |
| Fronteira           | <i>Lr20</i>      | 3    | 3    | 3    | 33+  | 22+  | 33+  | 3    | 3    | 3    | 3    |             |             |             | 25  | 3  | MR  | S   | S   |
| Janetzki FruherS    | <i>Lr28</i>      | 2    | 2    | 3    | 3    | 33+  | 33+  | 33+  | 3    | 3    | 3    |             |             |             | 45  | 4  | S   | S   | S   |
| Prospur             | <i>Lr28</i>      | 0    | 2    | 3    | 3    | 33-  | 33+  | 33+  | 3    | 3    | 3    |             | <i>Lr34</i> |             | 36  | 4  | MR  | MSS | MS  |
| Subgroup 2          |                  |      |      |      |      |      |      |      |      |      |      |             |             |             |     |    |     |     |     |
| Glenavon            | <i>Lr1,Lr10</i>  | 0    | 3    | 3    | 3    | 33+  | 33+  | 3    | 3    | 33+  | 3    | <i>Lr1</i>  | <i>Lr10</i> | <i>Lr34</i> | 28  | 5  | RMR | ?   | MS  |
| Koktunkulskaja 332  | <i>Lr1,Lr10</i>  | 0    | 3    | 3    | 3    | 33+  | 33+  | 33+  | 3    | 3    | 3    | <i>Lr1</i>  | <i>Lr10</i> |             | 47  | 4  | MSS | S   | MS  |
| Cargimarec          | <i>Lr1,Lr10</i>  | 0    | 3    | 3    | 3    | 33+  | 33+  | 3    | 3    | 3    | 3    | <i>Lr1</i>  | <i>Lr10</i> |             | 22  | 5  | ?   | S   | S   |
| Hohenhein           | <i>Lr1,Lr10</i>  | ;    | 3    | 3    | 3    | 3    | 33+  | 3    | 3    | 3    | 3    | <i>Lr1</i>  | <i>Lr10</i> |             | 50  | 6  | S   | S   | MSS |
| Jakutjanka          | <i>Lr1,Lr10</i>  | 3    | 3    | 3    | 3    | 3    | 33+  | 33+  | 3    | 3    | 3    | <i>Lr1</i>  | <i>Lr10</i> |             | 65  | 4  | 80  | S   | S   |
| Kamalinka           | <i>Lr1,Lr10</i>  | 3    | 3    | 3    | 3    | 33+  | 33+  | 33+  | 3    | 3    | 3    | <i>Lr1</i>  | <i>Lr10</i> |             | 49  | 5  | MS  | ?   | MS  |
| Krasnojarskaja 1103 | <i>Lr1,Lr10</i>  | 3    | 3    | 3    | 3    | 33+  | 33+  | 3    | 3    | 3    | 3    | <i>Lr1</i>  | <i>Lr10</i> |             | 69  | 3  | S   | S   | S   |
| Penkop              | <i>Lr1,Lr10</i>  | 3    | 3    | 3    | 3    | 33+  | 33+  | 3    | 3    | 3    | 3    | <i>Lr1</i>  | <i>Lr10</i> |             | 64  | 4  | MSS | S   | MSS |
| White Federation    | <i>Lr1,Lr10</i>  | 3    | 3    | 3    | 3    | ?    | 33+  | 3    | 3    | 3    | 3    | <i>Lr1</i>  | <i>Lr10</i> |             | 59  | 6  | ?   | S   | R   |
| Carina              | <i>Lr1,Lr2c</i>  | 0    | 0    | 0    | 3    | 33+  | 0    | 33+  | 3    | 3    | 3    | <i>Lr1</i>  |             |             | 65  | 4  | S   | MSS | S   |
| Hsin ShuKuan#1      | <i>Lr1,Lr14a</i> | 3    | 3    | 3    | 3    | X    | 33+  | x    | 3    | 33+  | 3    | <i>Lr1</i>  |             |             | 50  | 5  | MSS | S   | MS  |

| Accession name | Seedling genes  | BBBD | MBDS | MGBJ | TBJJ | TDBG | MBRJ | PBDQ | THMJ | TNRJ | TCRJ | Marker data |             |             | MRS | SE   | HR  |     |     |
|----------------|-----------------|------|------|------|------|------|------|------|------|------|------|-------------|-------------|-------------|-----|------|-----|-----|-----|
|                |                 |      |      |      |      |      |      |      |      |      |      | <i>Lr1</i>  | <i>Lr10</i> | <i>Lr34</i> |     |      | WPG | GLN | POR |
| New Pusa       | <i>Lr1,Lr20</i> | 2    | 3    | 3    | 3    | ;    | 33+  | 3    | 3    | 3    | 3    | <i>Lr1</i>  |             | 25          | 4   | MR   | MS  | MS  |     |
| Retacon INTA   | <i>Lr1,Lr20</i> | 0    | 3    | 3    | 2    | 33+  | 33+  | 33+  | 3    | 3    | 3    | <i>Lr1</i>  |             | 22          | 5   | MS   | S   | MS  |     |
| CN12666        | <i>Lr1,Lr20</i> | 1    | 3    | 3    | 3    | 0    | 33+  | 33+  | 3    | 3    | 3    | <i>Lr1</i>  | <i>Lr34</i> | 46          | 4   | ?    | S   | MS  |     |
| CN6025         | <i>Lr1,Lr20</i> | 0    | 3    | 3    | 3    | 22+  | 33+  | 3    | 3    | 3    | 3    | <i>Lr1</i>  |             | 58          | 5   | S    | S   | S   |     |
| Sabre          | <i>Lr1,Lr20</i> | 1    | 3    | 3    | 3    | 2    | 3    | 3    | 3    | 3    | 3    | <i>Lr1</i>  | <i>Lr34</i> | 34          | 7   | S    | ?   | MS  |     |
| Pobeda         | <i>Lr1,Lr20</i> | 3    | 3    | 3    | 3    | 2    | 33+  | 33+  | 3    | 3    | 3    | <i>Lr1</i>  |             | 66          | 4   | MSS  | S   | S   |     |
| CN12442        | <i>Lr1,Lr20</i> | 3    | 3    | 3    | 3    | 22+  | 33+  | 3    | 3    | 3    | 3    | <i>Lr1</i>  |             | 47          | 6   | MS   | S   | S   |     |
| Kenya Governor | <i>Lr1,Lr20</i> | 3    | 3    | 3    | 3    | 22+  | 3    | 3    | 3    | 3    | 3    | <i>Lr1</i>  | <i>Lr34</i> | 30          | 4   | MS   | S   | MSS |     |
| NING 8331      | <i>Lr1,Lr26</i> | 1    | 2    | 1    | ;    | X    | ;    | ;    | 3    | ;    | 33-  | <i>Lr1</i>  |             | 3           | 1   | ?    | ?   | ?   |     |
| Wildcat        | <i>Lr1,N</i>    | 0    | 3    | 3    | 3    | 33+  | 33+  | X    | 3    | 33+  | 3    | <i>Lr1</i>  |             | 66          | 5   | MRMS | MSS | S   |     |
| Xiang Mai No 1 | <i>Lr1,N</i>    | 1    | 3    | 3    | 2    | 33+  | 3    | 3    | 3    | 3    | 3    | <i>Lr1</i>  |             | 9           | 3   | MR   | MS  | R   |     |
| Touse          | <i>Lr1,N</i>    | 2    | 3    | 3    | 0    | 33+  | 33+  | 33+  | 3    | 3    | 3    | <i>Lr1</i>  |             | 69          | 3   | S    | S   | MS  |     |
| Buck Pucara    | <i>Lr1,N</i>    | 0    | 3    | 3    | 3    | 33+  | 33+  | ;1   | 3    | 3    | 3    | <i>Lr1</i>  |             | 19          | 4   | MR   | R   | MS  |     |
| Kukri          | <i>Lr1,N</i>    | 0    | 3    | 3    | 2    | 33-  | 33+  | 3    | 3    | 3    | 3    | <i>Lr1</i>  |             | 26          | 5   | MRMS | MS  | MSS |     |
| Tobari F66     | <i>Lr1,N</i>    | 0    | 3    | 3    | 2    | 33-  | 33+  | ;    | 3    | 3    | 3    | <i>Lr1</i>  |             | 26          | 5   | MRMS | MS  | R   |     |
| CDC Teal       | <i>Lr1,N</i>    | 2    | 3    | 2    | 1    | 33+  | X    | 0    | 3    | 21   | 3    | <i>Lr1</i>  | <i>Lr34</i> | 16          | 4   | MR   | MS  | MS  |     |

| Accession name   | Seedling genes    | BBBD | MBDS | MGBJ | TBJJ | TDBG | MBRJ | PBDQ | THMJ | TNRJ | TCRJ | Marker data |             |             | MRS | SE   | HR  |     |     |
|------------------|-------------------|------|------|------|------|------|------|------|------|------|------|-------------|-------------|-------------|-----|------|-----|-----|-----|
|                  |                   |      |      |      |      |      |      |      |      |      |      | <i>Lr1</i>  | <i>Lr10</i> | <i>Lr34</i> |     |      | WPG | GLN | POR |
| Klein Universal  | <i>Lr1,N</i>      | 3    | 3    | 0    | 2    | 33-  | 3    | 3    | 3    | 3    | 3    | <i>Lr1</i>  |             | 10          | 4   | MS   | R   | MSS |     |
| Fengcheung No.1  | <i>Lr1,N</i>      | 3    | 3    | 2    | 3    | 33+  | 3    | 33+  | 3    | 3    | 3    | <i>Lr1</i>  |             | 78          | 2   | S    | S   | S   |     |
| Jufy 2           | <i>Lr1,N</i>      | 3    | 3    | 3    | 2    | 33+  | 33+  | 3    | 3    | 3    | 3    | <i>Lr1</i>  |             | 65          | 4   | SMS  | S   | S   |     |
| Bersee           | <i>Lr10,Lr14a</i> | 3    | 3    | 3    | 3    | 33+  | 33+  | 3    | 3    | 3    | 3    | <i>Lr10</i> |             | 15          | 3   | MR   | RMR | R   |     |
| Pirana           | <i>Lr10,Lr20</i>  | 2    | 3    | 3    | 3    | ;    | 33+  | 3    | 3    | 3    | 3    | <i>Lr10</i> | <i>Lr34</i> | 15          | 3   | MS   | S   | MS  |     |
| Dominator        | <i>Lr10,Lr20</i>  | 1    | 3    | 3    | 3    | 22+  | 33+  | 33+  | 3    | 3    | 3    | <i>Lr10</i> |             | 70          | 4   | SMS  | S   | S   |     |
| CN6024           | <i>Lr10,Lr20</i>  | 1    | 3    | 3    | 3    | ;12  | 33+  | 3    | 3    | 3    | 3    | <i>Lr10</i> |             | 41          | 4   | S    | S   | S   |     |
| CN12388          | <i>Lr10,Lr20</i>  | 2    | 3    | 3    | 3    | 22+  | 33+  | 3    | 3    | 3    | 3    | <i>Lr10</i> | <i>Lr34</i> | 27          | 3   | MS   | MS  | MS  |     |
| Daeraad          | <i>Lr10,Lr20</i>  | 1    | 3    | 3    | 3    | 0    | 3    | 3    | 3    | 3    | 33-  | <i>Lr10</i> | <i>Lr34</i> | 36          | 5   | MRMS | S   | S   |     |
| CD87             | <i>Lr10,Lr20</i>  | ;    | 3    | 3    | 3    | 2    | 33+  | 3    | 3    | 3    | 3    | <i>Lr10</i> |             | 36          | 4   | MS   | S   | S   |     |
| CN12035          | <i>Lr10,Lr20</i>  | 1    | 3    | 3    | 3    | 0    | 33+  | 3    | 3    | 3    | 3    | <i>Lr10</i> |             | 47          | 7   | MR   | R   | R   |     |
| Trintani         | <i>Lr10,Lr20</i>  | 3    | 3    | 3    | 3    | 22+  | 33+  | 33+  | 3    | 3    | 3    | <i>Lr10</i> |             | 37          | 6   | MRMS | S   | S   |     |
| Olaeta Calandria | <i>Lr10,Lr20</i>  | 3    | 3    | 3    | 3    | X    | 33+  | 33+  | 3    | 33+  | 3    | <i>Lr10</i> |             | 69          | 4   | MS   | S   | MS  |     |
| CN1849           | <i>Lr10,Lr28</i>  | 2    | 1    | 3    | 3    | 33+  | 33+  | 3    | 3    | 3    | 3    | <i>Lr10</i> |             | 47          | 4   | MS   | MSS | MS  |     |
| CN12261          | <i>Lr10,N</i>     | 1    | 3    | 1    | 3    | 33+  | 22+  | 33+  | 3    | 33+  | 33-  | <i>Lr10</i> |             | 20          | 3   | MRMS | R   | MS  |     |
| Hybride DuJubile | <i>Lr10,N</i>     | 3    | 3    | 3    | 3    | 33-  | 22+  | 3    | 3    | 3    | 3    | <i>Lr10</i> |             | 56          | 3   | S    | S   | MSS |     |

| Accession name          | Seedling genes   | BBBD | MBDS | MGBJ | TJBJ | TDBG | MBRJ | PBDQ | THMJ | TNRJ | TCRJ | Marker data |             |             | MRS  | SE  | HR   |     |     |
|-------------------------|------------------|------|------|------|------|------|------|------|------|------|------|-------------|-------------|-------------|------|-----|------|-----|-----|
|                         |                  |      |      |      |      |      |      |      |      |      |      | <i>Lr1</i>  | <i>Lr10</i> | <i>Lr34</i> |      |     | WPG  | GLN | POR |
| Phoebus                 | <i>Lr10,N</i>    | 3    | 3    | 1    | 3    | 33-  | 33+  | 3    | 3    | 3+   | 33-+ | <i>Lr10</i> | 9           | 4           | MR   | R   | R    |     |     |
| Werna                   | <i>Lr10,N</i>    | 3    | 2    | 3    | 3    | 33+  | 2    | 33+  | 3    | 3    | 3    | <i>Lr10</i> | 31          | 3           | MR   | R   | S    |     |     |
| Combate                 | <i>Lr10,N</i>    | 3    | 3    | 3    | 3    | 33+  | 3    | x    | 3    | 3    | 33+  | <i>Lr10</i> | 22          | 3           | MR   | S   | S    |     |     |
| Arawa                   | <i>Lr3,Lr14a</i> | 2    | 3    | 3    | 3    | 21   | 33+  | ;1   | 3    | 3    | 3    |             | 13          | 2           | MRMS | R   | R    |     |     |
| Ladoga                  | <i>Lr3,Lr15</i>  | 0    | 3    | 3    | 3    | 33+  | 33+  | 33+  | 3    | ;12  | 3    |             | 71          | 5           | MS   | MS  | S    |     |     |
| KVL 2263                | <i>Lr3,Lr20</i>  | 2    | 3    | 3    | 3    | ;    | 33+  | 3    | 3    | 3    | 3    | <i>Lr34</i> | 8           | 1           | R    | R   | MRMS |     |     |
| Chengdu Guangtou        | <i>Lr3,Lr20</i>  | 1    | 3    | 3    | 3    | ;    | 3    | 3    | 3    | 3    | 3    |             | 6           | 2           | MRMS | R   | S    |     |     |
| Nan Tong DA<br>Huang PI | <i>Lr3,Lr20</i>  | 0    | 3    | 3    | 3    | ;1   | 33+  | 3    | 3    | 3    | 3    |             | 13          | 3           | MR   | MS  | ?    |     |     |
| Minskaja                | <i>Lr3,Lr20</i>  | ;    | 3    | 3    | 3    | ;    | 33+  | 33+  | 3    | 3    | 3    |             | 50          | 4           | S    | S   | MSS  |     |     |
| Setter                  | <i>Lr3,Lr20</i>  | 2    | 3    | 3    | 3    | 0    | 33+  | 3    | 3    | 3    | 3    |             | 18          | 4           | S    | R   | MS   |     |     |
| Musket                  | <i>Lr3,Lr20</i>  | 2    | 3    | 3    | 3    | 22+  | 33+  | 3    | 3    | 3    | 3    |             | 24          | 5           | MS   | MSS | MS   |     |     |
| Tonic                   | <i>Lr3,Lr20</i>  | 2    | 3    | 3    | 3    | 0    | 33+  | 3    | 3    | 3    | 3    |             | 34          | 5           | MRMS | MS  | MS   |     |     |
| Hope                    | <i>Lr3,Lr20</i>  | 0    | 3    | 3    | 3    | ;12  | 33+  | 3    | 3    | 3    | 3    | <i>Lr34</i> | 52          | 4           | MRMS | MSS | MSS  |     |     |
| Klein Toledo            | <i>Lr3,Lr20</i>  | 2    | 3    | 3    | 3    | 1    | 33+  | 3    | 3    | 3    | 3    |             | 4           | 1           | R    | R   | R    |     |     |
| Calidad                 | <i>Lr3,Lr20</i>  | 0    | 3    | 3    | 3    | X    | 33+  | 33+  | 3    | 3    | 3    |             | 30          | 6           | MS   | MS  | MS   |     |     |

| Accession name        | Seedling genes  | BBBD | MBDS | MGBJ | TJBJ | TDBG | MBRJ | PBDQ | THMJ | TNRJ | TCRJ | Marker data |             |             | MRS | SE | HR   |      |     |
|-----------------------|-----------------|------|------|------|------|------|------|------|------|------|------|-------------|-------------|-------------|-----|----|------|------|-----|
|                       |                 |      |      |      |      |      |      |      |      |      |      | <i>Lr1</i>  | <i>Lr10</i> | <i>Lr34</i> |     |    | WPG  | GLN  | POR |
| Surpresa              | <i>Lr3,Lr20</i> | 1    | 3    | 3    | 3    | 22+  | 33+  | 3-   | 3    | 3    | 3    |             |             |             | 25  | 4  | MR   | S    | MSS |
| Toropi                | <i>Lr3,Lr20</i> | 2    | 3    | 3    | 3    | 22+  | 33+  | 3    | 3    | 3    | 3    |             |             |             | 8   | 2  | ?    | MS   | MS  |
| Menkemen              | <i>Lr3,Lr20</i> | 0    | 3    | 3    | 3    | 22+  | 3    | 3    | 3    | 3    | 3    |             | <i>Lr34</i> |             | 22  | 4  | ?    | MSS  | R   |
| Maribal 50            | <i>Lr3,Lr20</i> | ;    | 3    | 3    | 3    | 22+  | 33+  | 3    | 3    | 3    | 3    |             |             |             | 38  | 5  | MS   | S    | S   |
| Sunstar               | <i>Lr3,N</i>    | 2    | 3    | 3    | 3    | 3    | 33+  | 3    | 3    | 3    | 0    |             |             |             | 37  | 6  | MS   | MS   | MS  |
| Prinqual              | <i>Lr3,N</i>    | ;    | 3    | 0    | 3    | 33+  | 33+  | 3    | 3    | 3    | 3    |             | <i>Lr34</i> |             | 25  | 3  | MR   | MS   | MS  |
| CN12268               | <i>Lr3,N</i>    | 2    | 3    | 3    | 3    | 33+  | 33+  | ;    | 3    | 3    | 3    |             |             |             | 31  | 4  | R    | S    | MS  |
| Rayhany               | <i>Lr3,N</i>    | 1    | 3    | 2    | 3    | 33+  | ?    | 33+  | 3    | 3    | 3    |             |             |             | 76  | 6  | S    | S    | S   |
| Froubou               | <i>Lr3,N</i>    | 1    | 3    | 3    | 1    | 33+  | 33+  | 3    | 3    | 3    | 3    |             |             |             | 2   | 1  | R    | R    | R   |
| Gogatsukomugai        | <i>Lr3,N</i>    | 2    | 3    | 2    | 3    | 33+  | 33+  | 33+  | 3    | 3    | 3    |             |             |             | 39  | 6  | MS   | S    | MSS |
| HY 320                | <i>Lr3,N</i>    | 2    | 3    | 3    | 2    | 33+  | 3    | 3-   | 3    | 33+  | 0    |             |             |             | 39  | 5  | R    | MRMS | ?   |
| Funo                  | <i>Lr3,N</i>    | 2    | 3    | 3    | 3    | 33+  | 22+  | 3    | 3    | 33+  | 2    |             |             |             | 38  | 4  | MS   | MS   | MS  |
| Squarhead's<br>Master | <i>Lr3,N</i>    | 2    | 3    | 2    | 3    | 33+  | 33+  | x    | 3    | 3    | 3    |             |             |             | 60  | 5  | S    | ?    | S   |
| Bola Picota           | <i>Lr3,N</i>    | 1    | 3    | 3    | 3    | 33+  | 2    | ;    | 3    | 3    | 3    |             |             |             | 31  | 5  | MS   | R    | MS  |
| El Gaucho             | <i>Lr2c,N</i>   | 2    | 1    | 0    | ;    | 3    | 1    | 3    | 3    | 3    | 3    |             | <i>Lr34</i> |             | 2   | 1  | MRMS | R    | R   |

| Accession name   | Seedling genes   | BBBD | MBDS | MGBJ | TJBj | TDBG | MBRJ | PBDQ | THMJ | TNRJ | TCRJ | Marker data |             |             | MRS | SE   | HR  |     |     |
|------------------|------------------|------|------|------|------|------|------|------|------|------|------|-------------|-------------|-------------|-----|------|-----|-----|-----|
|                  |                  |      |      |      |      |      |      |      |      |      |      | <i>Lr1</i>  | <i>Lr10</i> | <i>Lr34</i> |     |      | WPG | GLN | POR |
| Tropeano         | <i>Lr14a,N</i>   | 3    | 2    | 3    | 2    | 22+  | 33+  | x    | 3    | 3    | 3    |             | <i>Lr34</i> | 5           | 2   | R    | MS  | R   |     |
| NING 8026        | <i>Lr15,N</i>    | 2    | 3    | 12   | 2    | 33+  | ;    | ;12  | 3    | ;1   | 3    |             |             | 52          | 4   | MRMS | MS  | MS  |     |
| CN11698          | <i>Lr15,N</i>    | 3    | 3    | 2    | 2    | 3    | 1    | 3    | ;    | ;    | ;    |             |             | 10          | 2   | MR   | R   | R   |     |
| Warden           | <i>Lr20,Lr28</i> | 2    | 1    | 3    | 3    | 0    | 33+  | 33+  | 3    | 33+  | 3    |             |             | 45          | 5   | MS   | S   | MS  |     |
| DART             | <i>Lr20,Lr28</i> | 3    | 2    | 3    | 3    | 21   | 33+  | 3    | 3    | 3    | 3    |             |             | 54          | 6   | MS   | S   | S   |     |
| BAART            | <i>Lr20,Lr28</i> | 1    | 2    | 3    | 3    | 22+  | 33+  | 3    | 33+  | 3    | 3    |             |             | 51          | 5   | S    | S   | MS  |     |
| Girija           | <i>Lr20,N</i>    | 3    | 3    | 3    | 2    | 0    | 3-   | 3    | 3    | 3    | 3    |             | <i>Lr34</i> | 11          | 3   | MS   | R   | R   |     |
| Kozlodui         | <i>Lr20,N</i>    | 3    | 2    | 3    | 3    | 2;   | 33+  | 3    | 3    | 3    | 3    |             |             | 61          | 7   | S    | S   | S   |     |
| Acadimia 48      | <i>Lr20,N</i>    | 3    | 3    | 3    | 3    | 22+  | 22+  | 3    | 3    | 3    | 3    |             |             | 37          | 5   | MS   | MSS | MS  |     |
| Mentana          | <i>Lr20,N</i>    | 3    | 2    | 3    | 3    | 22+  | 33+  | 3    | 3    | 3    | 3    |             | <i>Lr34</i> | 36          | 5   | MS   | S   | S   |     |
| Equator          | <i>Lr20,N</i>    | 3    | 2    | 3    | 3    | 22+  | 3    | 3    | 3    | 3    | 3    |             |             | 30          | 7   | S    | S   | S   |     |
| Kenya 58         | <i>Lr20,N</i>    | 3    | 3    | 3    | 2    | ;12  | 33+  | 3    | 3    | 3    | 3    |             | <i>Lr34</i> | 17          | 3   | MS   | MS  | MS  |     |
| Pacific Bluestem | <i>Lr20,N</i>    | 33+  | 2    | 3    | 3    | 22+  | 3    | 3    | 3    | 3    | 3    |             |             | 35          | 5   | MS   | R   | MS  |     |
| CN30213          | <i>Lr20,N</i>    | 3    | 2    | 2    | 3    | ;    | 3    | 3    | 3    | 3    | 3    |             |             | 31          | 4   | MRMS | MSS | MS  |     |
| Benvenuto 3085   | <i>Lr20,N</i>    | 3    | 2    | 3    | 2    | X    | 33+  | 33+  | 3    | 3    | 3    |             | <i>Lr34</i> | 4           | 1   | MS   | R   | R   |     |
| Colonias         | <i>Lr20,N</i>    | 1    | 3    | 2    | 2    | 21   | 33+  | 3    | 3    | 33+  | 3    |             |             | 16          | 3   | MRMS | S   | R   |     |

| Accession name | Seedling genes       | BBBD | MBDS | MGBJ | TBJJ | TDBG | MBRJ | PBDQ | THMJ | TNRJ | TCRJ | Marker data |             |             | MRS | SE | HR   |     |     |
|----------------|----------------------|------|------|------|------|------|------|------|------|------|------|-------------|-------------|-------------|-----|----|------|-----|-----|
|                |                      |      |      |      |      |      |      |      |      |      |      | <i>Lr1</i>  | <i>Lr10</i> | <i>Lr34</i> |     |    | WPG  | GLN | POR |
| Camadi         | <i>Lr20,N</i>        | 3    | 1    | ;    | 2    | 22+  | 2    | 3    | 3-   | 3    | 3    |             |             |             | 4   | 1  | R    | MR  | R   |
| Encruzilhada   | <i>Lr28,N</i>        | 2    | 0    | 2    | 2    | 33+  | 33+  | 33+  | 3    | 3    | 3    |             |             |             | 6   | 2  | MR   | R   | R   |
| Arcola         | <i>Lr28,N</i>        | 2    | 1    | 2    | 3    | 33+  | 3    | 3    | 33+  | 3    | 3    |             |             |             | 3   | 1  | R    | ?   | MS  |
| Lom            | <i>Lr28,N</i>        | 2    | 1    | 1    | 3    | 3    | 33+  | 3    | 3    | 3+   | 3    |             |             |             | 17  | 5  | R    | R   | R   |
| Dorziyeh Safra | <i>Lr28,N</i>        | 1    | 1    | 0    | 2    | 33+  | 3    | 3    | 3    | 3    | 3    |             |             |             | 5   | 1  | R    | MS  | ?   |
| Pampa INTA     | <i>Lr28,N</i>        | 2    | 2    | 2    | 3    | 2    | 33+  | 3    | 3    | 3    | 3    |             | <i>Lr34</i> |             | 3   | 1  | MR   | R   | MS  |
| AC Minto       | <i>Lr28,N</i>        | 1    | 2    | 1    | 2    | 33+  | 33+  | ;3   | 3    | 3    | 3    |             |             |             | 8   | 2  | R    | RMR | R   |
| Subgroup 3     |                      |      |      |      |      |      |      |      |      |      |      |             |             |             |     |    |      |     |     |
| Jumbuck        | <i>Lr3,Lr20,N</i>    | 1    | 3    | 3    | 2    | ;    | 33+  | 3    | 3    | 3    | 3    |             | <i>Lr34</i> |             | 48  | 5  | MRMS | S   | MS  |
| Bluesky        | <i>Lr1,Lr10,N</i>    | 0    | 3    | 2    | 3    | 33+  | 33+  | 33+  | 3    | 3    | 3    | <i>Lr1</i>  | <i>Lr10</i> |             | 19  | 3  | MS   | MS  | MR  |
| RL4452         | <i>Lr1,Lr10,N</i>    | 0    | 3    | 2    | 3    | 33+  | 3    | 3    | 3    | 33+  | 3    | <i>Lr1</i>  | <i>Lr10</i> |             | 28  | 5  | MRMS | MS  | S   |
| Roblin         | <i>Lr1,Lr10,N</i>    | 0    | 3    | 3    | 2    | 33+  | 33+  | 3    | 3    | 3    | 3    | <i>Lr1</i>  | <i>Lr10</i> | <i>Lr34</i> | 30  | 5  | MR   | SMS | MS  |
| Corrine        | <i>Lr1,Lr10,N</i>    | 0    | 3    | 2    | 3    | 33+  | 3    | 3    | 3    | 3    | 3    | <i>Lr1</i>  | <i>Lr10</i> |             | 16  | 2  | R    | SMS | MS  |
| Laura          | <i>Lr1,Lr10,N</i>    | 0    | 3    | 2    | 3    | 33+  | 33+  | 3    | 3    | 3    | 3    | <i>Lr1</i>  | <i>Lr10</i> | <i>Lr34</i> | 5   | 2  | MR   | R   | R   |
| BW 90          | <i>Lr1,Lr10,N</i>    | 2    | 3    | 3    | 12   | 33+  | 3    | 3    | 3    | 3    | 3    | <i>Lr1</i>  | <i>Lr10</i> |             | 13  | 2  | MRMS | MS  | MS  |
| Otane          | <i>Lr1,Lr10,Lr20</i> | ;    | 3    | 3    | 3    | 2    | 3    | 33+  | 3    | 3    | 3    | <i>Lr1</i>  | <i>Lr10</i> |             | 31  | 5  | MRMS | S   | MS  |



| Accession name            | Seedling genes       | BBBD | MBDS | MGBJ | TJBj | TDBG | MBRJ | PBDQ | THMJ | TNRJ | TCRJ | Marker data |             |             | MRS | SE | HR   |     |     |
|---------------------------|----------------------|------|------|------|------|------|------|------|------|------|------|-------------|-------------|-------------|-----|----|------|-----|-----|
|                           |                      |      |      |      |      |      |      |      |      |      |      | <i>Lr1</i>  | <i>Lr10</i> | <i>Lr34</i> |     |    | WPG  | GLN | POR |
| Biggar                    | <i>Lr3,15,N</i>      | 2    | 3    | 3    | 2    | 33+  | 3    | 3    | 3    | 22+  | 3    |             |             |             | 28  | 3  | ?    | R   | S   |
| CN11204                   | <i>Lr1,Lr20,N</i>    | 2    | 3    | 3    | 3    | ;    | 22+  | 33+  | 3    | 3    | 3    | <i>Lr1</i>  | <i>Lr34</i> | 8           | 2   | MS | MS   | MS  |     |
| Katja A1                  | <i>Lr1,Lr20,Lr28</i> | ;    | 2    | 3    | 3    | 32   | 33+  | 33+  | 3    | 3    | 3    | <i>Lr1</i>  |             | 24          | 6   | S  | S    | MS  |     |
| Parana                    | <i>Lr10,Lr20,N</i>   | ;    | 3    | 3    | 2    | 22+  | 3    | 3    | 3    | 3    | 3    |             | <i>Lr10</i> | 19          | 4   | MS | R    | R   |     |
| CN6171                    | <i>Lr3,Lr20,N</i>    | 1    | 3    | 3    | 2    | 22+  | 33+  | 3    | 3    | 3    | 3    |             |             | 53          | 5   | S  | MSS  | MS  |     |
| Marquillo                 | <i>Lr10,Lr20,N</i>   | 2    | 3    | 3    | 3    | 22+  | 22+  | 3    | 3    | 3    | 3    |             | <i>Lr10</i> | 24          | 3   | MR | MRMS | MS  |     |
| AC Vista                  | <i>Lr3,Lr14a,N</i>   | 2    | 3    | 3    | 2    | X    | 33+  | ;1   | 3    | 3    | 3    |             |             | 29          | 5   | MR | MSS  | S   |     |
| HY358                     | <i>Lr3,Lr14a,N</i>   | ;    | 3    | 3    | 2    | X    | 33+  | x    | 3    | 33+  | 3    |             |             | 21          | 2   | R  | MS   | MS  |     |
| Fu Mai No 3               | <i>Lr1,Lr15,N</i>    | 2    | 3    | 3    | 3    | 33+  | 2    | ;1   | 3    | 23   | 3    | <i>Lr1</i>  |             | 37          | 4   | MS | MS   | R   |     |
| Bajio                     | <i>Lr1,Lr14a,N</i>   | 0    | 3    | 3    | 12   | 0    | 33+  | X    | 3    | 3    | 3    | <i>Lr1</i>  | <i>Lr34</i> | 18          | 3   | MR | MS   | MS  |     |
| Victoria INTA             | <i>Lr1,Lr14a,N</i>   | 1    | 3    | 2    | 3    | ;    | 33+  | ;    | 3    | 3-   | 3    | <i>Lr1</i>  |             | 16          | 3   | MS | MS   | MS  |     |
| Tezanos Printos<br>Precoz | <i>Lr3,Lr20,N</i>    | 0    | 3    | 2    | 2    | 21   | 33+  | 3    | 3    | 3    | 3    |             | <i>Lr34</i> | 6           | 1   | MR | MRMS | R   |     |
| Fortaleza                 | <i>Lr3,Lr20,N</i>    | 2    | 3    | 2    | 1    | 0    | 33+  | 3    | 3    | 33+  | 3    |             | <i>Lr34</i> | 3           | 1   | R  | R    | R   |     |
| Helvia                    | <i>Lr10,Lr14a,N</i>  | 2    | 3    | 3    | 3    | 22+  | 22+  | ;1   | 3    | 3    | 3    |             | <i>Lr10</i> | 56          | 5   | S  | MR   | ?   |     |
| Duiker                    | <i>Lr1,Lr14a,</i>    | 2    | 2    | 3    | 3    | 22+  | 33+  | x    | 3    | 3    | 3    | <i>Lr1</i>  |             | 71          | 3   | MR | MRMS | MS  |     |

| Accession name  | Seedling genes       | BBBD | MBDS | MGBJ | TJBJ | TDBG | MBRJ | PBDQ | THMJ | TNRJ | TCRJ | Marker data |             |             | MRS | SE | HR   |      |     |
|-----------------|----------------------|------|------|------|------|------|------|------|------|------|------|-------------|-------------|-------------|-----|----|------|------|-----|
|                 |                      |      |      |      |      |      |      |      |      |      |      | <i>Lr1</i>  | <i>Lr10</i> | <i>Lr34</i> |     |    | WPG  | GLN  | POR |
| <i>Lr28</i>     |                      |      |      |      |      |      |      |      |      |      |      |             |             |             |     |    |      |      |     |
| Columbus        | <i>Lr3,Lr15,N</i>    | 1    | 3    | 3    | 3    | 33+  | 2    | ;12  | 3    | 21   | 2    |             |             |             | 49  | 5  | MRMS | MS   | S   |
| Yang Mai No.1   | <i>Lr3,Lr15,N</i>    | 2    | 3    | 3    | 3    | 33+  | 33+  | ;1   | 3    | 12   | 3    |             |             |             | 46  | 5  | MS   | MSS  | S   |
| Buck Nandu      | <i>Lr10,Lr28,N</i>   | 0    | 1    | 3    | 3    | 33+  | 1    | ;    | 3    | 33+  | 2    |             | <i>Lr10</i> |             | 23  | 5  | MSS  | MR   | MS  |
| Universal II    | <i>Lr1,Lr28,N</i>    | 2    | 0    | 2    | 2    | 33-  | 33+  | ;2   | 3    | 3    | 3    | <i>Lr1</i>  |             |             | 14  | 4  | S    | R    | MS  |
| Trintecinco     | <i>Lr10,Lr20,N</i>   | 1    | 3    | 2    | 2    | 0    | 22+  | 3    | 3    | 33+  | 3    |             | <i>Lr10</i> |             | 11  | 3  | MR   | MRMS | MS  |
| Cinquentenario  | <i>Lr3,Lr14a,N</i>   | 2    | 3    | 3    | 2    | 22+  | 22+  | ;1   | 3    | 33+  | 3    |             |             |             | 7   | 2  | MR   | MS   | R   |
| Burnside        | <i>Lr10,Lr3ka/30</i> | 1    | 1    | ;    | ;    | 0    | 33+  | 0    | 3    | 33+  | 3    |             | <i>Lr10</i> |             | 4   | 1  | MR   | R    | R   |
| Tambillo 1      | <i>Lr20,Lr28,N</i>   | 1    | 2    | 2    | ?    | 21   | 2    | x    | 3    | 33+  | ;12  |             |             |             | 5   | 1  | ?    | ?    | R   |
| Oslo            | <i>Lr3,Lr20,N</i>    | 1    | 3    | 1    | 2    | X    | 2;   | 33+  | 3    | ;    | 2    |             |             |             | 24  | 4  | MR   | MS   | ?   |
| CN12358         | <i>Lr3,Lr15,N</i>    | ;    | 3    | 1    | 2    | 3    | 1    | 3    | ;    | 0    | ;1   |             |             |             | 6   | 2  | MR   | R    | R   |
| Americano 44D   | <i>Lr1,Lr20,N</i>    | 3    | 3    | 2    | 2    | 12;  | 2    | 33+  | 3    | 3    | 3    | <i>Lr1</i>  |             |             | 8   | 3  | MRMS | R    | R   |
| Alfy 2          | <i>Lr1,Lr20,N</i>    | 3    | 2    | 3    | 3    | 21   | 33+  | 33+  | 3    | 3    | 3    | <i>Lr1</i>  |             |             | 48  | 5  | S    | S    | MSS |
| Wheaton         | <i>Lr1,Lr15,N</i>    | 3    | 3    | 1    | 3    | 33+  | 1    | ;1   | 3    | ;    | 23   | <i>Lr1</i>  |             |             | 30  | 5  | R    | S    | ?   |
| Major           | <i>Lr1,Lr20,N</i>    | 3    | 2    | 3    | 3    | 2    | 33+  | 3    | 3    | 3    | 3    | <i>Lr1</i>  |             |             | 42  | 6  | MRMS | R    | R   |
| Indur compactum | <i>Lr10,Lr20,N</i>   | 3    | 2    | 1    | 3    | 0    | 1    | 3    | 3    | 3    | 3-   |             | <i>Lr10</i> |             | 57  | 7  | S    | S    | MSS |

| Accession name | Seedling genes                     | BBBD | MBDS | MGBJ | TJBJ | TDBG | MBRJ | PBDQ | THMJ | TNRJ | TCRJ | Marker data |             |             | MRS | SE   | HR  |     |     |
|----------------|------------------------------------|------|------|------|------|------|------|------|------|------|------|-------------|-------------|-------------|-----|------|-----|-----|-----|
|                |                                    |      |      |      |      |      |      |      |      |      |      | <i>Lr1</i>  | <i>Lr10</i> | <i>Lr34</i> |     |      | WPG | GLN | POR |
| Rio Negro      | <i>Lr10,Lr14a,N</i>                | 3    | 3    | 3    | 2    | X    | 33+  | ;    | 3    | 3    | 3    | <i>Lr10</i> | <i>Lr34</i> | 3           | 1   | R    | R   | R   |     |
| Warigo         | <i>Lr10,Lr20,N</i>                 | 3    | 3    | 3    | 3    | 22+  | 3    | 3    | 3    | 3    | 3    | <i>Lr10</i> |             | 44          | 5   | MS   | SMS | MS  |     |
| Cobbs 1066     | <i>Lr10,Lr20,N</i>                 | 3    | 3    | 3    | 3    | 22+  | 33+  | 3    | 3    | 3    | 3    | <i>Lr10</i> |             | 23          | 4   | MS   | MS  | MS  |     |
| Kenya          | <i>Lr1,Lr10,N</i>                  | 3    | 3    | 3    | 2    | 3    | 33+  | 3    | 3    | 3    | 3    | <i>Lr1</i>  | <i>Lr10</i> | 46          | 5   | MSS  | S   | S   |     |
| Bencubbin      | <i>Lr1,Lr10,Lr20</i>               | 3    | 3    | 3    | 3    | X    | 33+  | 3    | 3    | 3    | 3    | <i>Lr1</i>  | <i>Lr10</i> | 45          | 6   | S    | S   | MS  |     |
| Klein Trou     | <i>Lr1,Lr10,Lr20</i>               | 3    | 3    | 3    | 33+  | ;    | 33+  | 33+  | 3    | 3    | 3    | <i>Lr1</i>  | <i>Lr10</i> | 34          | 6   | MS   | ?   | MS  |     |
| Subgroup 4     |                                    |      |      |      |      |      |      |      |      |      |      |             |             |             |     |      |     |     |     |
| Frontana       | <i>Lr10,Lr20,<br/>Lr28,N</i>       | 1    | 2    | 3    | 2    | 22+  | 33+  | 3    | 3    | 3    | 3    | <i>Lr10</i> | <i>Lr34</i> | 3           | 1   | R    | R   | R   |     |
| CN37599        | <i>Lr10,Lr15,<br/>Lr20,N</i>       | 1    | 3    | 2    | 3    | ;    | 2    | 3    | 3    | ;12  | 33-  | <i>Lr10</i> |             | 31          | 3   | MS   | S   | MS  |     |
| Bage           | <i>Lr1,Lr10,Lr20,N</i>             | 2    | 3    | 2    | 2    | 0    | ;1   | 33+  | 3    | 3-   | 3    | <i>Lr1</i>  | <i>Lr10</i> | <i>Lr34</i> | 22  | 5    | MS  | S   | R   |
| Katepwa        | <i>Lr1,Lr10,<br/>Lr3ka or Lr30</i> | 1    | 1    | 2    | 2    | 22+  | 33+  | x    | 3    | 3    | 3    | <i>Lr1</i>  | <i>Lr10</i> |             | 36  | 5    | MR  | MS  | MS  |
| CN12229        | <i>Lr10,Lr2c,<br/>Lr15,N</i>       | 1    | 2    | 12   | 3    | 33-  | 22+  | 3    | 3    | ;12  | 21   |             |             | 18          | 4   | MRMS | R   | MS  |     |
| Klein Sendero  | <i>Lr15,Lr20,</i>                  | 1    | 2    | ;    | ;    | 21;  | 1    | 33+  | 3    | 0    | ;    |             |             | 14          | 4   | MR   | R   | MS  |     |

| Accession name | Seedling genes                    | BBBD | MBDS | MGBJ | TJBj | TDBG | MBRJ | PBDQ | THMJ | TNRJ | TCRJ | Marker data |             |             | MRS | SE   | HR  |     |     |
|----------------|-----------------------------------|------|------|------|------|------|------|------|------|------|------|-------------|-------------|-------------|-----|------|-----|-----|-----|
|                |                                   |      |      |      |      |      |      |      |      |      |      | <i>Lr1</i>  | <i>Lr10</i> | <i>Lr34</i> |     |      | WPG | GLN | POR |
|                | <i>Lr28,N</i>                     |      |      |      |      |      |      |      |      |      |      |             |             |             |     |      |     |     |     |
| CN40895        | <i>Lr10,Lr15,<br/>Lr20,N</i>      | 3    | 2    | ;    | 1    | 22+  | 1    | 3    | ;12  | ;12  | ;12  | <i>Lr10</i> |             | 8           | 3   | ?    | MR  | R   |     |
| Koalisie       | <i>Lr1,Lr10,Lr20,N</i>            | 3    | 2    | 3    | 3    | 22+  | 33+  | 33+  | 3    | 3    | 3    | <i>Lr1</i>  | <i>Lr10</i> | 21          | 5   | ?    | MSS | S   |     |
| Dromedaris     | <i>Lr1,Lr10,Lr20,N</i>            | 3    | 3    | 2    | 3    | 0    | 33+  | 3    | 3    | 3    | 3    | <i>Lr1</i>  | <i>Lr10</i> | 53          | 4   | ?    | ?   | MS  |     |
| Stoa           | <i>Lr10,Lr2c,<br/>Lr15,N</i>      | 0    | ;    | ;    | 3    | 33+  | 0    | 3    | ;    | ;1   | 0    | <i>Lr10</i> |             | 46          | 4   | MRMS | MS  | S   |     |
| Nordic         | <i>Lr1,Lr10,Lr2a,Lr1<br/>5,N</i>  | 0    | 2    | 2    | 3    | 33-  | 2    | 2    | 3    | ;    | 2    | <i>Lr1</i>  | <i>Lr10</i> | 16          | 3   | MRMS | MS  | R   |     |
| NING 7840      | <i>Lr1,Lr14b,<br/>Lr15,Lr20,N</i> | 3    | 2    | ;    | 12   | 22+  | ;    | ;    | 33+  | ;    | 3    | <i>Lr1</i>  | <i>Lr34</i> | 3           | 1   | MR   | R   | R   |     |

Infection types: 0 = no flecks or uredinia, 0; = faint hypersensitive flecks, ; = hypersensitive flecks, 1 = small uredinia with necrosis, , 2 = small to medium uredinia with necrosis, 3 = moderate to large size uredinia with/without chlorosis, 4 = very large uredinia without chlorosis, "+" = indicates slightly larger uredinia, "-" = indicates slightly smaller uredinia, ITs with two symbols denote a range in IT: 22+= indicates a mixture of 2 size uredinia with chlorosis and slightly larger uredinia with chlorosis. Host response (HR): 0 = no flecks or uredinia, R = small uredinia with necrosis, MR = moderate size uredinia with necrosis, MRMS = small to medium size uredinia with moderate sporulation, MS = moderate size uredinia with chlorosis, S = large uredinia. MRS: Maximum rust severity. SE: standard error. ?: missing data

**Table S4.** Analysis of variance of rust severity rating of 275 accessions of a world collection of wheat tested in nine environments

| Source of Variation          | DF   | SS      | MS      | F Value | Pr>F   | Variance components | %    |
|------------------------------|------|---------|---------|---------|--------|---------------------|------|
| Environments                 | 8    | 231276  | 28909.0 | 20.6    | <.0001 | 57.5                | 7.7  |
| Accessions                   | 274  | 1526625 | 5571.6  | 11.7    | <.0001 | 324.3               | 43.4 |
| With <i>Lr34</i>             | 51   | 168505  | 3304.0  | 8.6     | <.0001 |                     |      |
| Without <i>Lr34</i>          | 222  | 1235863 | 5566.9  | 11.3    | <.0001 |                     |      |
| With vs. without <i>Lr34</i> | 1    | 122257  | 122257  | 553     | <.0001 |                     |      |
| Block(Environment)           | 9    | 10188   | 1132.0  | 5.1     | <.0001 | 3.9                 | 0.5  |
| Environments by Accessions   | 2102 | 1019685 | 485.1   | 2.2     | <.0001 | 140.5               | 18.8 |
| Residual                     | 2105 | 465480  | 221.1   | .       | .      | 221.1               | 29.6 |

---

S.E. Mean = 0.41
